# Supplementary material
Source: PubMed Central journal article supplement (PMC6343851)
Supplement: NIHMS1511549-supplement-2.pdf [file NIHMS1511549-supplement-2.pdf]

**A**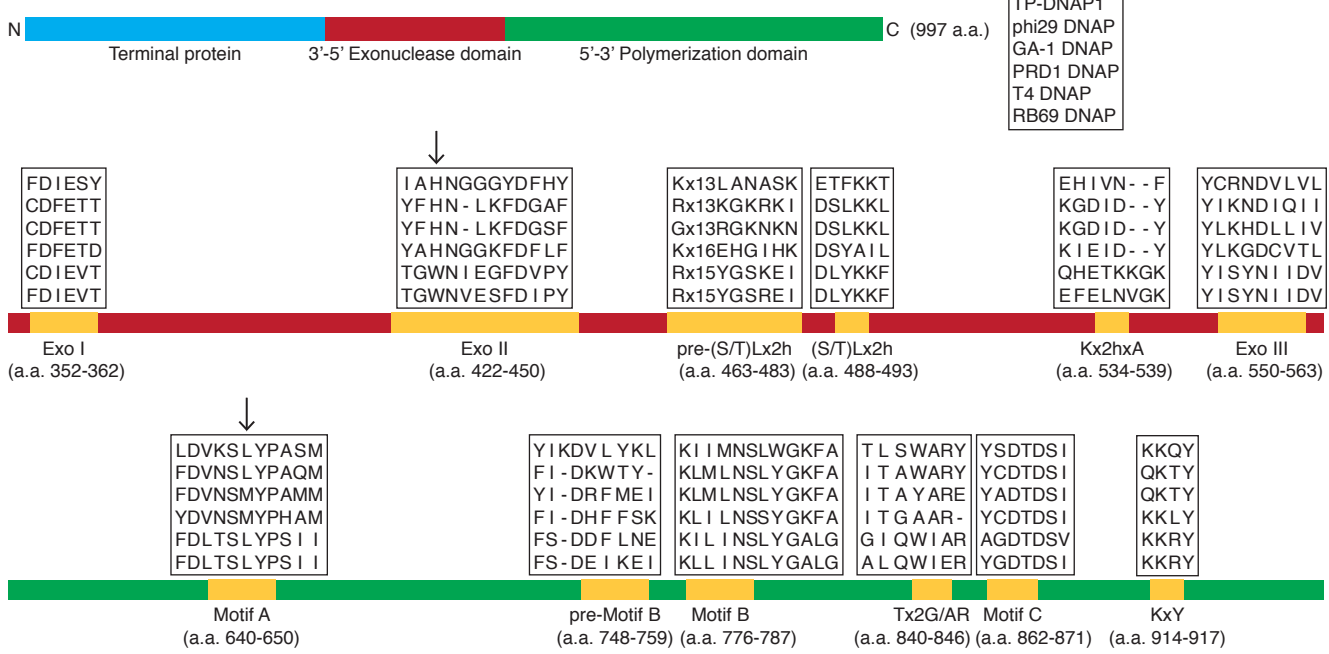**B**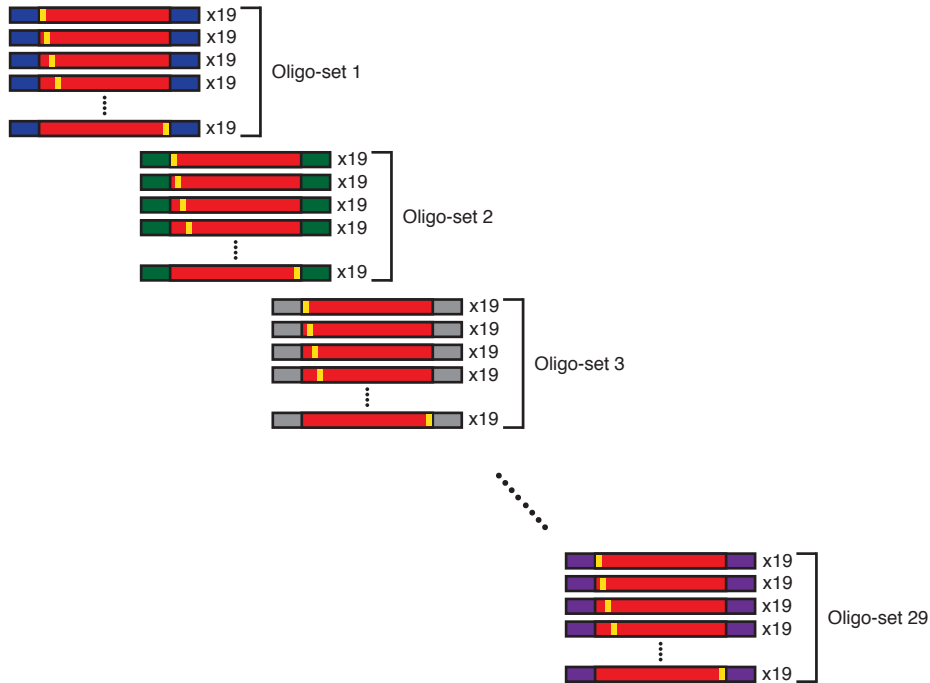**C**

| a.a. | Codon |
|------|-------|
| A    | GCT   |
| R    | AGA   |
| N    | AAC   |
| D    | GAC   |
| C    | TGT   |
| Q    | CAA   |
| E    | GAA   |
| G    | GGT   |
| H    | CAC   |
| I    | ATC   |
| L    | TTG   |
| K    | AAG   |
| M    | ATG   |
| F    | TTC   |
| P    | CCA   |
| S    | TCT   |
| T    | ACC   |
| W    | TGG   |
| Y    | TAC   |
| V    | GTT   |

**D**

| Oligo-set | Variable region (# a.a.) |
|-----------|--------------------------|
| 1         | 30                       |
| 2         | 30                       |
| 3         | 50                       |
| 4         | 50                       |
| 5         | 30                       |
| 6         | 30                       |
| 7         | 30                       |
| 8         | 30                       |
| 9         | 30                       |
| 10        | 30                       |
| 11        | 35                       |
| 12        | 30                       |
| 13        | 30                       |
| 14        | 20                       |
| 15        | 30                       |
| 16        | 50                       |
| 17        | 30                       |
| 18        | 30                       |
| 19        | 30                       |
| 20        | 45                       |
| 21        | 25                       |
| 22        | 50                       |
| 23        | 30                       |
| 24        | 30                       |
| 25        | 45                       |
| 26        | 20                       |
| 27        | 50                       |
| 28        | 50                       |
| 29        | 50                       |
