# Supplementary material
Source: PubMed Central journal article supplement (PMC6343851)
Supplement: NIHMS1511549-supplement-3.pdf [file NIHMS1511549-supplement-3.pdf]

**A**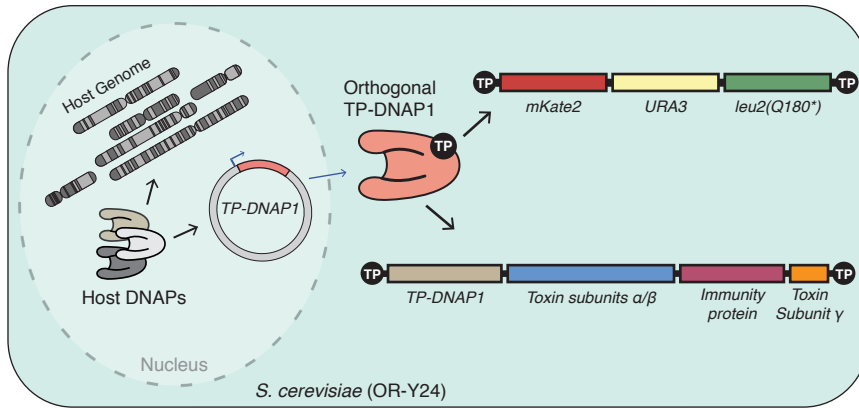**B**

| Selection Stringency      | % full-length clones (n) |             |
|---------------------------|--------------------------|-------------|
|                           | Sub-lib. 14              | Sub-lib. 21 |
| Initial outgrowth (SC-H)  | 70% (20)                 | 35% (20)    |
| Initial outgrowth (SC-UH) | 94% (18)                 | 76% (21)    |
| Passage 1 (SC-UH)         | n.d.                     | 87% (16)    |
| Passage 3 (SC-UH)         | 100% (5)                 | 100% (17)   |
| Passage 4 (SC-UH)         | 100% (6)                 | 100% (7)    |
