# Supplementary material
Source: PubMed Central journal article supplement (PMC6343851)
Supplement: NIHMS1511549-supplement-4.pdf [file NIHMS1511549-supplement-4.pdf]

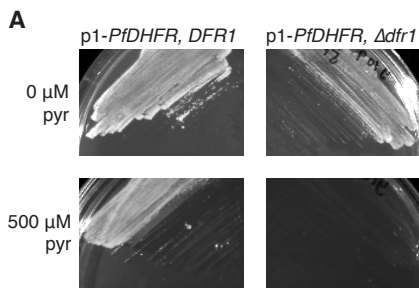

**B**

| Plasmid (DNAP)                   | Mutation rate (s.p.b.) | Average plasmid copy number | Number of cells plated on 500 μM pyr | Number of resistant colonies |
|----------------------------------|------------------------|-----------------------------|--------------------------------------|------------------------------|
| <i>CEN6/ARS4</i> (genomic DNAPs) | $1.86 \times 10^{-10}$ | 1-5                         | $\sim 1 \times 10^9$                 | <50                          |
| p1 (N423E)                       | $1.81 \times 10^{-7}$  | 15.05                       | $8 \times 10^7$                      | $\sim 150$                   |
| p1 (I777K, L900S)                | $2.18 \times 10^{-6}$  | 16.00                       | $4 \times 10^8$                      | >500                         |

**C**

| TP-DNAP1     | Mutation rate (s.p.b.) | <i>PfDHFR</i> mutations               |                                       |
|--------------|------------------------|---------------------------------------|---------------------------------------|
|              |                        | 1:25 passaging                        | 1:250 passaging                       |
| w.t.         | $2.23 \times 10^{-9}$  | S108N                                 | (extinction)                          |
| N423E        | $1.81 \times 10^{-7}$  | S108N                                 | S108N                                 |
| I777K, L900S | $2.18 \times 10^{-6}$  | prom -87 T->C,<br>D54N, Y57H,<br>C59R | D54N, Y57H,<br>I163V, V168I,<br>G264D |
