# Supplementary material
Source: PubMed Central journal article supplement (PMC6343851)

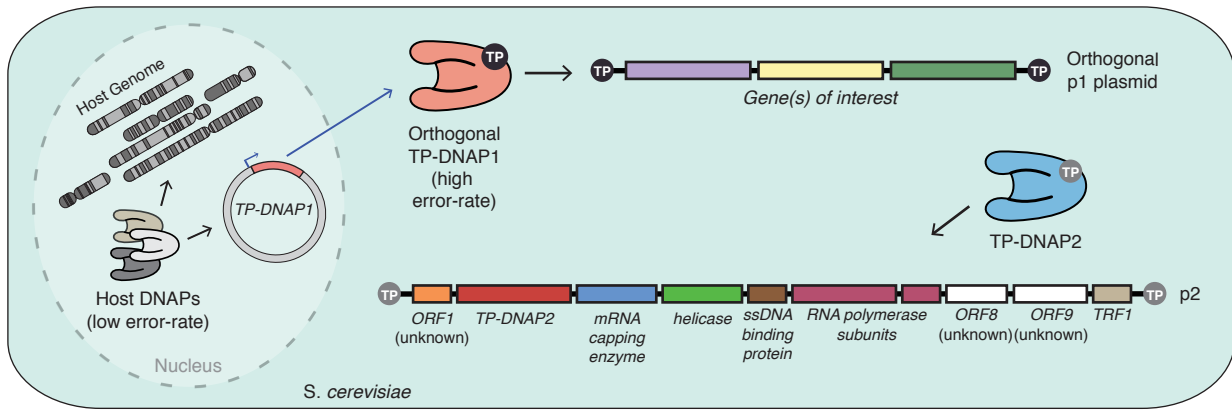

Supplement: NIHMS1511549-supplement-1.pdf [file NIHMS1511549-supplement-1.pdf]

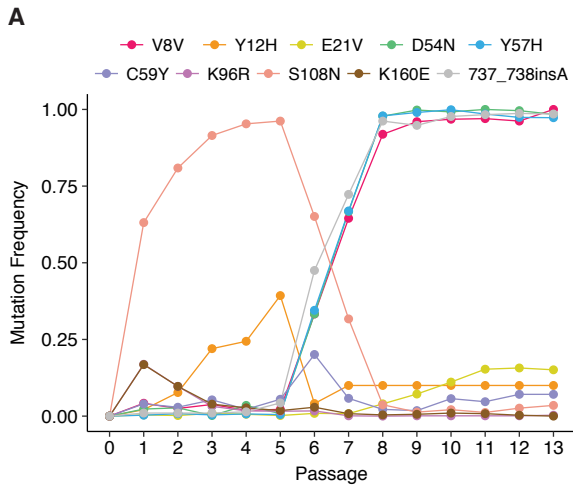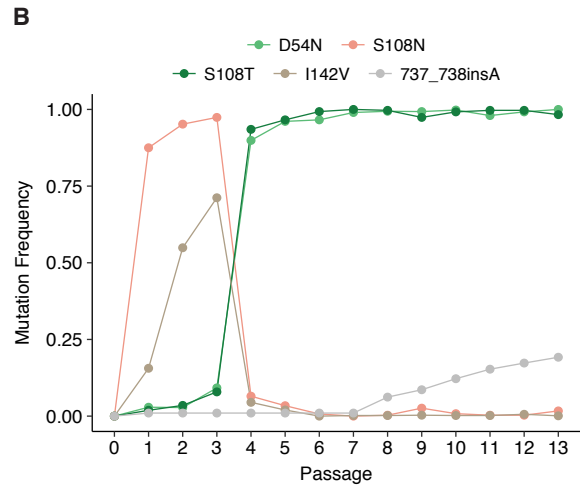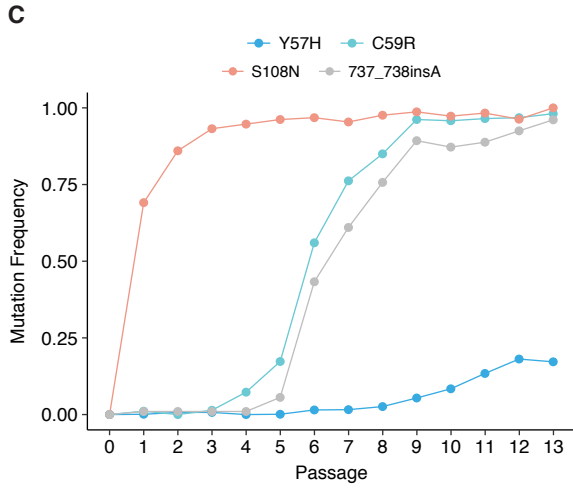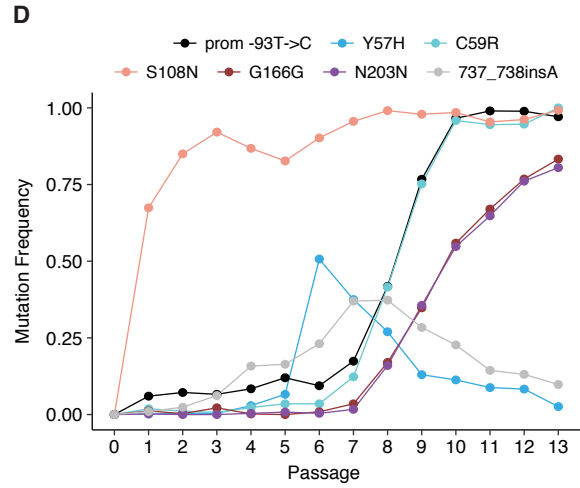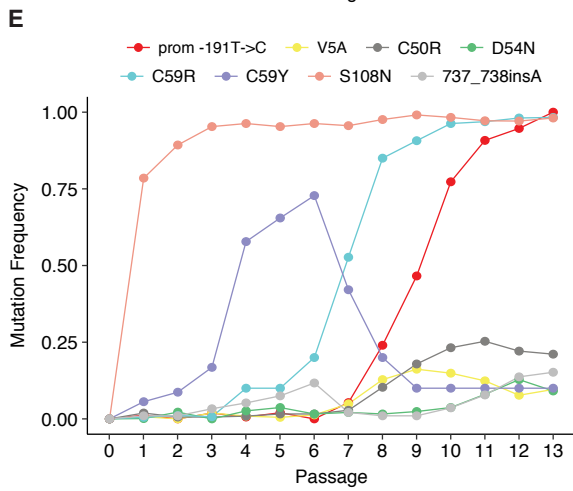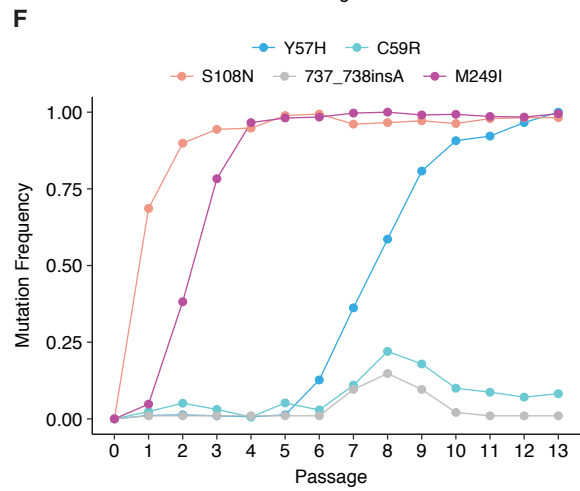

Supplement: NIHMS1511549-supplement-5.pdf [file NIHMS1511549-supplement-5.pdf]
